# Supplementary material for: Mesospheric gravity wave activity estimated via airglow imagery, multistatic meteor radar, and SABER data taken during the SIMONe–2018 campaign
Source: Copernicus journal article supplement (doi:10.5194/acp-2020-896), 2020-09-08

## High-frequency, small horizontal scale wave analysis, O(1S) emission

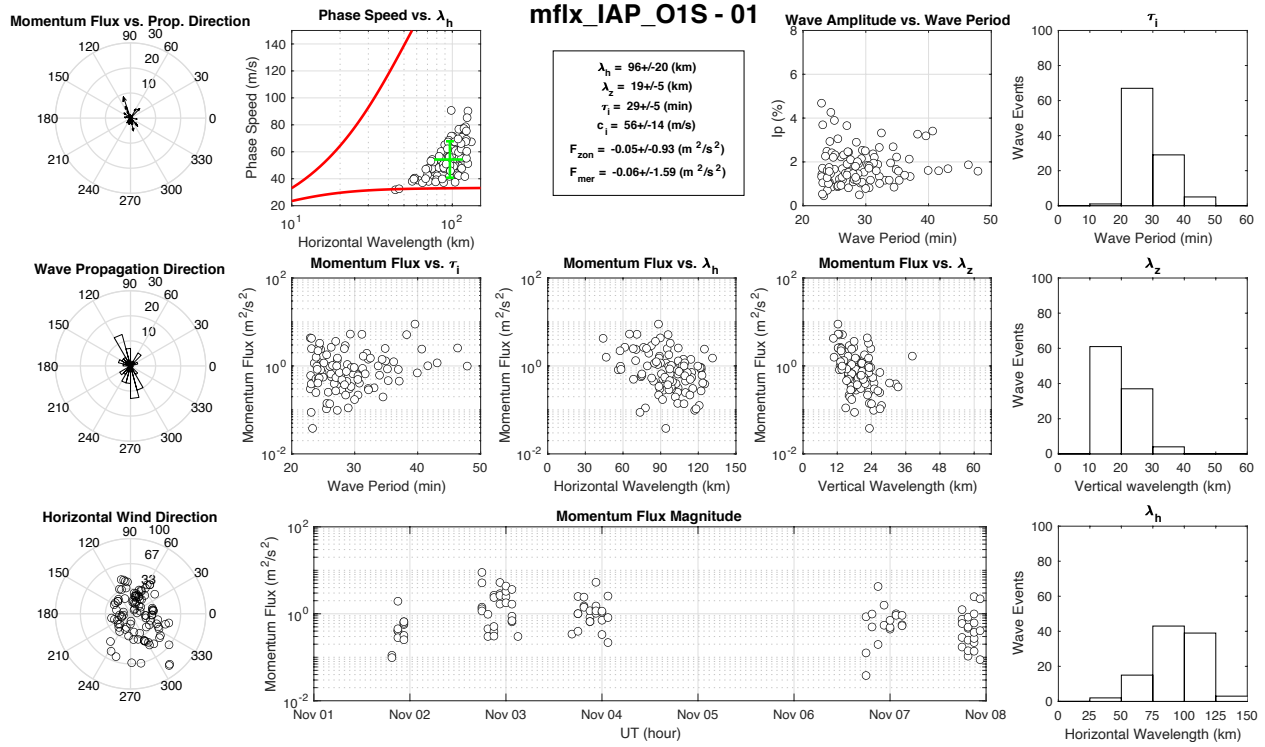

## High-frequency, small horizontal scale wave analysis, O2 emission

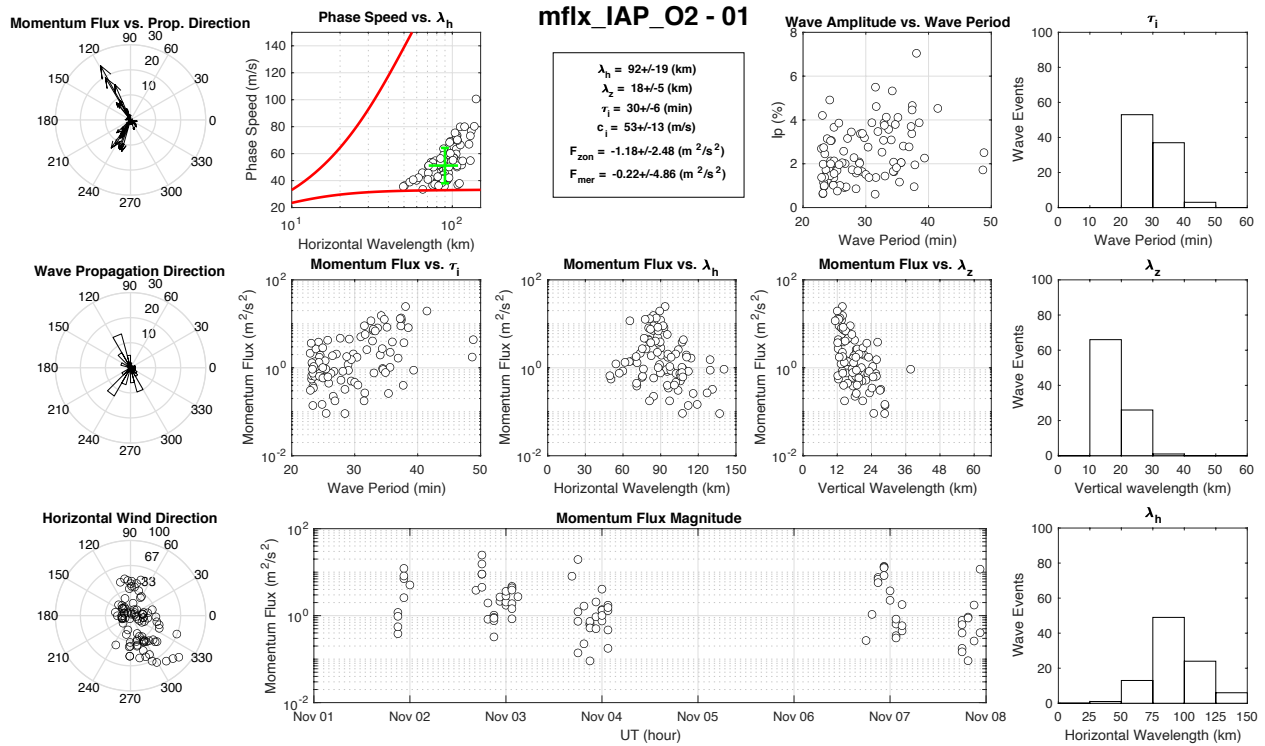

## High-frequency, small horizontal scale wave analysis, NaD emission

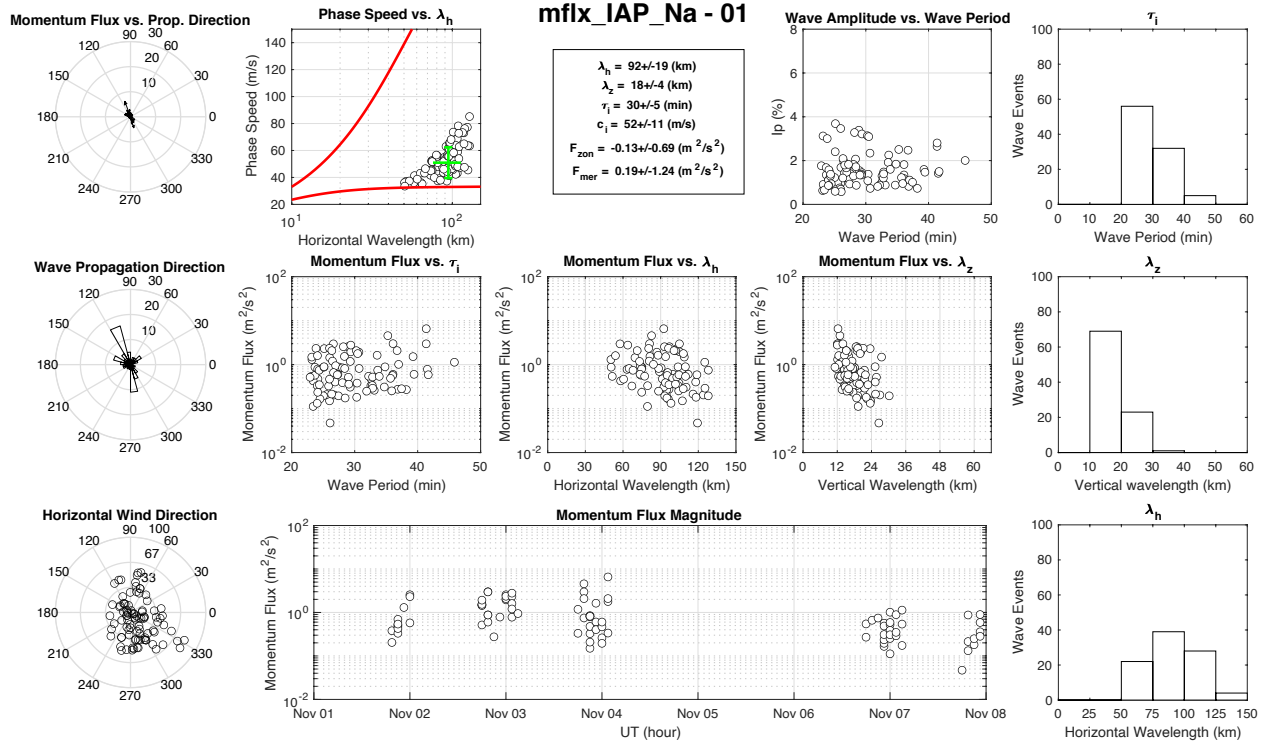

## High-frequency, small horizontal scale wave analysis, OH emission

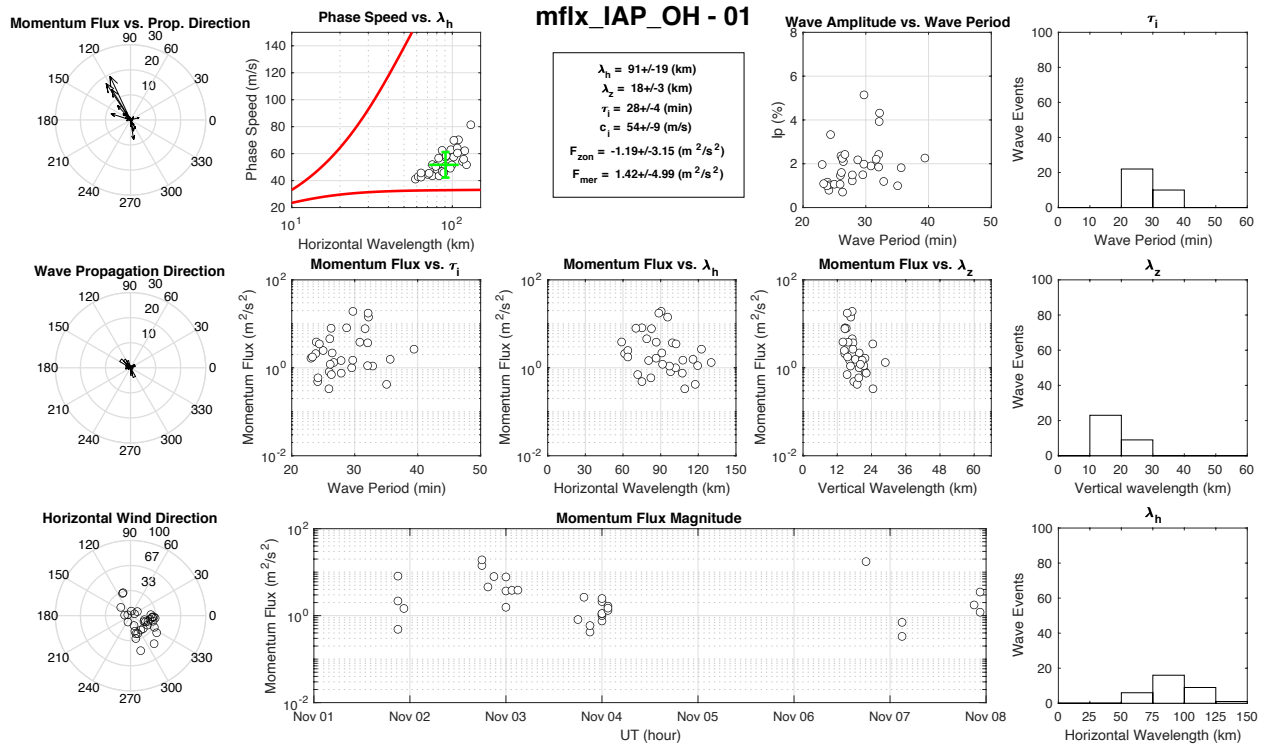

Supplement: Supplementary file 1 [file supplementary info - hf AGWs.pdf › supplementary info - hf AGWs.pdf]
